# Supplementary material
Source: publisher site journal article supplement (https://www.jstage.jst.go.jp/article/geochemj/56/4/56_GJ22008/_supplement/_download/56_GJ22008_1.pdf)
Supplement: Supplementary file 1 [file 56_GJ22008_1.pdf]

**Table A1 (U-Th)/He ages of 24ZK01, 2FK and 3FK profiles in Jiao-Liao ore fields.**

| Sample   | Grain  | U (ppm) | Th (ppm) | [eU] <sup>a</sup> (ppm) | He(nmol/g) | Th/U | mass( $\mu$ g) | Rs ( $\mu$ m) | Raw Age (Ma) | $\pm \sigma$ (Ma) | Ft <sup>b</sup> | Cor Age (Ma) | $\pm \sigma$ (Ma) |
|----------|--------|---------|----------|-------------------------|------------|------|----------------|---------------|--------------|-------------------|-----------------|--------------|-------------------|
| 24ZK01   | Zircon |         |          |                         |            |      |                |               |              |                   |                 |              |                   |
| 24ZK01-1 | Z1     | 636.5   | 197.1    | 682.8                   | 257.8      | 0.3  | 1.06           | 35.5          | 70.1         | 1.6               | 0.70            | 100.1        | 6.0               |
|          | Z4     | 582.8   | 222.5    | 635.1                   | 299.0      | 0.4  | 13.34          | 73.7          | 87.3         | 1.9               | 0.85            | 103.2        | 5.7               |
| 24ZK01-2 | Z1     | 303.0   | 149.3    | 338.1                   | 146.4      | 0.5  | 6.43           | 56.1          | 80.3         | 1.8               | 0.79            | 101.2        | 5.5               |
|          | Z2     | 433.8   | 67.4     | 449.6                   | 198.4      | 0.2  | 2.95           | 46.6          | 81.9         | 1.9               | 0.79            | 104.2        | 6.0               |
|          | Z3     | 406.3   | 89.9     | 427.4                   | 159.4      | 0.2  | 3.89           | 48.1          | 69.3         | 1.6               | 0.76            | 90.6         | 5.0               |
|          | Z4     | 265.9   | 20.3     | 270.6                   | 123.6      | 0.1  | 2.07           | 43.3          | 84.7         | 2.0               | 0.81            | 104.3        | 6.4               |
| 24ZK01-3 | Z1     | 499.5   | 124.2    | 528.7                   | 221.0      | 0.3  | 7.20           | 48.6          | 77.6         | 1.8               | 0.77            | 100.8        | 5.5               |
|          | Z3     | 695.5   | 191.7    | 740.5                   | 274.9      | 0.3  | 1.65           | 37.4          | 69.0         | 1.6               | 0.70            | 98.8         | 5.4               |
|          | Z4     | 159.1   | 69.4     | 175.4                   | 72.0       | 0.5  | 1.58           | 36.8          | 76.1         | 1.7               | 0.79            | 96.1         | 6.0               |
| 24ZK01-4 | Z1     | 133.2   | 46.2     | 144.0                   | 62.1       | 0.4  | 13.09          | 71.7          | 80.0         | 1.8               | 0.84            | 95.4         | 5.2               |
|          | Z2     | 456.7   | 106.8    | 481.8                   | 170.4      | 0.2  | 4.77           | 50.6          | 65.7         | 1.5               | 0.78            | 84.5         | 4.6               |
|          | Z3     | 506.2   | 143.5    | 539.9                   | 181.5      | 0.3  | 5.77           | 45.8          | 62.5         | 1.4               | 0.76            | 82.7         | 4.6               |
|          | Z4     | 241.7   | 139.1    | 274.4                   | 89.1       | 0.6  | 1.63           | 35.8          | 60.3         | 1.3               | 0.68            | 88.1         | 4.8               |
| 24ZK01-5 | Z1     | 778.9   | 257.6    | 839.5                   | 327.8      | 0.3  | 7.21           | 57.9          | 72.5         | 1.7               | 0.80            | 90.4         | 5.0               |
|          | Z3#    | 231.6   | 203.7    | 279.5                   | 249.7      | 0.9  | 4.06           | 45.2          | 164.4        | 3.9               | 0.75            | 219.4        | 12.1              |
|          | Z6     | 477.1   | 196.2    | 523.2                   | 148.8      | 0.4  | 3.21           | 42.5          | 52.9         | 1.0               | 0.74            | 71.9         | 3.8               |
|          | Z8     | 314.5   | 124.9    | 343.9                   | 115.7      | 0.4  | 1.94           | 39.2          | 62.5         | 1.3               | 0.71            | 87.9         | 4.8               |
| 24ZK01-6 | Z1     | 199.4   | 85.8     | 219.6                   | 65.3       | 0.4  | 14.39          | 66.1          | 55.3         | 1.0               | 0.83            | 67.0         | 3.6               |
|          | Z2     | 102.4   | 68.0     | 118.4                   | 42.3       | 0.7  | 9.52           | 64.9          | 66.3         | 1.1               | 0.82            | 80.8         | 4.2               |
|          | Z4     | 126.5   | 104.5    | 151.1                   | 47.6       | 0.9  | 5.29           | 48.4          | 58.5         | 1.0               | 0.76            | 76.9         | 4.0               |
|          | Z6     | 275.5   | 188.9    | 319.9                   | 114.2      | 0.7  | 4.69           | 50.2          | 66.2         | 1.1               | 0.76            | 87.6         | 4.6               |
| 24ZK01-7 | Z3     | 128.5   | 84.8     | 148.5                   | 49.0       | 0.7  | 4.45           | 49.7          | 61.2         | 1.1               | 0.77            | 79.6         | 4.2               |
|          | Z4     | 138.0   | 113.4    | 164.6                   | 60.4       | 0.8  | 3.67           | 49.3          | 68.1         | 1.2               | 0.76            | 89.1         | 4.7               |

| Sample    | Grain   | U (ppm) | Th (ppm) | [eU] <sup>a</sup> (ppm) | He (nmol/g) | Th/U | Mass (μg) | Rs (μm) | Raw Age (Ma) | ± σ (Ma) | Ft <sup>b</sup> | Cor Age (Ma) | ± σ (Ma) |
|-----------|---------|---------|----------|-------------------------|-------------|------|-----------|---------|--------------|----------|-----------------|--------------|----------|
|           | Z6      | 147.3   | 56.5     | 160.6                   | 46.3        | 0.4  | 9.78      | 65.9    | 53.6         | 1.0      | 0.82            | 65.1         | 3.5      |
| 24ZK01-8  | Z1      | 169.5   | 84.0     | 189.3                   | 60.4        | 0.5  | 5.81      | 52.7    | 59.3         | 1.0      | 0.78            | 76.0         | 4.0      |
|           | Z2      | 251.1   | 113.5    | 277.8                   | 79.2        | 0.5  | 3.32      | 43.8    | 53.0         | 1.0      | 0.74            | 71.7         | 3.8      |
|           | Z3      | 74.9    | 40.6     | 84.5                    | 27.3        | 0.6  | 6.28      | 54.9    | 60.0         | 1.0      | 0.79            | 76.2         | 4.0      |
|           | Z4#     | 265.8   | 95.8     | 288.3                   | 124.2       | 0.4  | 3.38      | 46.1    | 80.0         | 1.5      | 0.75            | 105.9        | 5.7      |
| 24ZK01-9  | Z1      | 45.8    | 23.8     | 51.4                    | 14.7        | 0.5  | 16.50     | 84.9    | 53.0         | 0.9      | 0.86            | 61.5         | 3.3      |
|           | Z3      | 75.1    | 32.1     | 82.7                    | 29.5        | 0.4  | 7.80      | 67.0    | 66.3         | 1.3      | 0.83            | 80.1         | 4.3      |
|           | Z5      | 323.2   | 87.5     | 343.8                   | 128.6       | 0.3  | 4.58      | 48.5    | 69.5         | 1.3      | 0.77            | 90.5         | 4.8      |
|           | Z6      | 305.4   | 70.1     | 321.9                   | 110.7       | 0.2  | 8.10      | 57.2    | 63.9         | 1.2      | 0.80            | 79.7         | 4.3      |
|           | Z8      | 87.2    | 47.8     | 98.4                    | 27.7        | 0.6  | 6.62      | 52.5    | 52.4         | 0.9      | 0.80            | 65.5         | 3.5      |
|           | Z9      | 188.5   | 67.2     | 204.3                   | 68.5        | 0.4  | 7.25      | 54.0    | 62.3         | 1.1      | 0.77            | 81.1         | 4.3      |
| 24ZK01-10 | Z6      | 206.2   | 130.5    | 236.9                   | 77.5        | 0.7  | 4.66      | 48.6    | 60.7         | 1.0      | 0.77            | 79.4         | 4.2      |
|           | Z7      | 71.9    | 60.0     | 86.0                    | 29.7        | 0.9  | 4.92      | 54.1    | 64.1         | 1.1      | 0.78            | 81.8         | 4.3      |
|           | Z10     | 260.1   | 59.2     | 274.0                   | 75.8        | 0.2  | 5.78      | 50.6    | 51.5         | 1.0      | 0.80            | 64.3         | 3.5      |
|           | Z11     | 1239.7  | 427.0    | 1340.0                  | 436.6       | 0.4  | 1.86      | 38.4    | 60.5         | 1.1      | 0.80            | 75.5         | 4.0      |
| 24ZK01-11 | Z2      | 1153.9  | 76.0     | 1171.7                  | 439.5       | 0.1  | 6.68      | 59.7    | 69.7         | 1.4      | 0.81            | 86.0         | 4.6      |
|           | Z3      | 67.6    | 37.0     | 76.3                    | 20.2        | 0.6  | 1.84      | 39.2    | 49.2         | 1.4      | 0.71            | 69.4         | 4.0      |
|           | Z4      | 682.0   | 29.1     | 688.8                   | 191.0       | 0.04 | 2.22      | 43.9    | 51.6         | 1.0      | 0.74            | 69.4         | 3.7      |
| 24ZK01-12 | Z2#     | 144.1   | 54.6     | 157.0                   | 161.6       | 0.4  | 5.45      | 55.2    | 189.1        | 3.5      | 0.79            | 239.1        | 12.7     |
|           | Z4      | 267.3   | 39.1     | 276.4                   | 73.4        | 0.2  | 2.42      | 44.3    | 49.5         | 1.0      | 0.75            | 66.2         | 3.6      |
|           | Z5      | 280.5   | 82.9     | 300.0                   | 88.8        | 0.3  | 2.23      | 38.6    | 55.0         | 1.0      | 0.71            | 77.8         | 4.2      |
|           | Z6      | 351.6   | 84.1     | 371.3                   | 117.0       | 0.2  | 1.29      | 36.8    | 58.6         | 1.2      | 0.70            | 84.1         | 4.5      |
|           | Z9      | 215.5   | 50.1     | 227.2                   | 49.1        | 0.2  | 1.51      | 36.0    | 40.2         | 0.8      | 0.66            | 60.6         | 3.2      |
| 24ZK01-1  | Apatite |         |          |                         |             |      |           |         |              |          |                 |              |          |
|           | A1      | 1.7     | 10.4     | 4.1                     | 1.2         | 6.4  | 2.2       | 48.5    | 54.2         | 1.1      | 0.69            | 78.2         | 4.2      |
|           | A2#     | 2.0     | 6.5      | 3.6                     | 3.1         | 3.3  | 6.1       | 52.5    | 158.3        | 2.4      | 0.78            | 202.6        | 10.6     |

| Sample    | Grain | U (ppm) | Th (ppm) | [eU] <sup>a</sup> (ppm) | He (nmol/g) | Th/U | Mass (μg) | Rs (μm) | Raw Age (Ma) | ± σ (Ma) | Ft <sup>b</sup> | Cor Age (Ma) | ± σ (Ma) |
|-----------|-------|---------|----------|-------------------------|-------------|------|-----------|---------|--------------|----------|-----------------|--------------|----------|
|           | A7    | 4.1     | 19.4     | 8.6                     | 2.6         | 4.9  | 2.7       | 52.6    | 56.1         | 0.9      | 0.72            | 77.9         | 4.1      |
|           | A12   | 4.3     | 20.3     | 9.0                     | 2.2         | 4.9  | 1.1       | 40.0    | 45.7         | 1.6      | 0.64            | 71.7         | 4.4      |
| 24ZK01-3  | A1    | 2.3     | 10.0     | 4.6                     | 1.1         | 4.6  | 2.9       | 52.2    | 45.0         | 0.8      | 0.72            | 62.8         | 3.3      |
|           | A6    | 5.4     | 24.9     | 11.2                    | 2.3         | 4.8  | 1.1       | 38.2    | 38.5         | 0.8      | 0.62            | 62.1         | 3.4      |
|           | A10   | 5.3     | 28.0     | 11.9                    | 2.8         | 5.5  | 0.8       | 32.9    | 43.5         | 0.9      | 0.57            | 76.9         | 4.2      |
|           | A11   | 5.7     | 29.8     | 12.7                    | 2.1         | 5.4  | 0.6       | 31.6    | 30.9         | 0.8      | 0.55            | 56.2         | 3.2      |
|           | A12   | 12.5    | 12.6     | 15.5                    | 3.2         | 1.0  | 1.5       | 42.7    | 38.4         | 0.8      | 0.68            | 56.8         | 3.1      |
| 24ZK01-5  | A2    | 1.2     | 13.0     | 4.2                     | 0.9         | 11.5 | 1.5       | 41.5    | 40.4         | 2.1      | 0.64            | 63.1         | 4.5      |
|           | A4#   | 1.6     | 13.8     | 4.8                     | 4.2         | 8.9  | 7.2       | 61.6    | 157.4        | 2.4      | 0.81            | 194.8        | 10.2     |
|           | A9    | 11.4    | 17.1     | 15.4                    | 3.2         | 1.6  | 3.6       | 54.4    | 38.6         | 0.6      | 0.74            | 52.2         | 2.7      |
|           | A10   | 2.4     | 14.0     | 5.7                     | 1.6         | 6.0  | 2.1       | 46.6    | 52.0         | 1.4      | 0.72            | 72.3         | 4.1      |
| 24ZK01-7  | A6    | 3.2     | 14.2     | 6.5                     | 1.3         | 4.6  | 1.3       | 41.4    | 37.2         | 1.1      | 0.65            | 57.2         | 3.3      |
|           | A7    | 3.5     | 13.8     | 6.7                     | 1.1         | 4.1  | 2.1       | 49.4    | 30.0         | 0.7      | 0.70            | 42.7         | 2.3      |
|           | A9    | 5.9     | 30.2     | 13.0                    | 2.9         | 5.3  | 1.1       | 38.2    | 41.3         | 0.8      | 0.62            | 66.5         | 3.6      |
|           | A10   | 4.4     | 22.8     | 9.8                     | 2.1         | 5.3  | 1.0       | 37.9    | 39.9         | 0.9      | 0.62            | 64.6         | 3.5      |
| 24ZK01-8  | A1#   | 0.6     | 2.4      | 1.1                     | 1.6         | 4.4  | 12.9      | 74.2    | 261.4        | 11.4     | 0.84            | 309.7        | 16.2     |
|           | A3#   | 3.0     | 13.2     | 6.1                     | 6.3         | 4.5  | 4.1       | 45.2    | 187.9        | 9.1      | 0.76            | 248.2        | 13.0     |
|           | A5    | 9.3     | 24.3     | 15.0                    | 2.6         | 2.7  | 1.6       | 43.2    | 31.5         | 0.6      | 0.67            | 47.0         | 2.5      |
|           | A6    | 4.0     | 21.6     | 9.1                     | 1.3         | 5.5  | 1.0       | 37.0    | 25.9         | 0.7      | 0.61            | 42.4         | 2.4      |
| 24ZK01-9  | A1    | 2.3     | 13.9     | 5.6                     | 0.5         | 6.2  | 2.5       | 49.3    | 18.2         | 0.4      | 0.70            | 26.2         | 1.4      |
|           | A3    | 4.6     | 20.8     | 9.5                     | 1.4         | 4.7  | 2.3       | 45.7    | 27.2         | 0.5      | 0.69            | 39.7         | 2.1      |
|           | A4    | 1.7     | 7.8      | 3.6                     | 0.5         | 4.6  | 2.6       | 49.4    | 26.2         | 0.8      | 0.71            | 37.2         | 2.2      |
|           | A7    | 16.7    | 18.9     | 21.1                    | 1.8         | 1.2  | 1.1       | 37.4    | 16.3         | 0.4      | 0.63            | 25.7         | 1.4      |
| 24ZK01-10 | A3#   | 1.2     | 4.5      | 2.3                     | 1.1         | 3.8  | 5.7       | 52.7    | 92.2         | 4.5      | 0.78            | 117.7        | 6.2      |
|           | A4    | 4.8     | 8.6      | 6.8                     | 1.0         | 1.9  | 4.2       | 48.4    | 26.2         | 0.5      | 0.76            | 34.6         | 1.9      |
|           | A7    | 4.5     | 13.2     | 7.6                     | 1.0         | 3.1  | 1.8       | 47.1    | 24.0         | 0.5      | 0.69            | 34.5         | 1.9      |

| Sample    | Grain  | U (ppm) | Th (ppm) | [eU] <sup>a</sup> (ppm) | He (nmol/g) | Th/U | Mass (μg) | Rs (μm) | Raw Age (Ma) | ± σ (Ma) | Ft <sup>b</sup> | Cor Age (Ma) | ± σ (Ma) |
|-----------|--------|---------|----------|-------------------------|-------------|------|-----------|---------|--------------|----------|-----------------|--------------|----------|
|           | A8     | 4.6     | 15.0     | 8.1                     | 1.0         | 3.4  | 1.3       | 40.8    | 22.7         | 0.7      | 0.65            | 34.9         | 2.1      |
| 24ZK01-11 | A2     | 2.3     | 11.4     | 5.0                     | 0.6         | 5.1  | 3.0       | 48.3    | 23.5         | 0.6      | 0.69            | 33.9         | 1.9      |
|           | A5     | 9.9     | 14.8     | 13.4                    | 1.0         | 1.5  | 1.4       | 43.5    | 13.9         | 0.4      | 0.68            | 20.5         | 1.2      |
|           | A6     | 2.3     | 16.3     | 6.1                     | 0.4         | 7.4  | 1.0       | 36.8    | 12.1         | 0.8      | 0.60            | 20.0         | 1.7      |
|           | A7     | 1.8     | 16.0     | 5.6                     | 0.5         | 9.0  | 1.8       | 43.7    | 17.7         | 0.5      | 0.66            | 26.9         | 1.6      |
| 24ZK01-12 | A1     | 6.6     | 54.1     | 19.3                    | 1.5         | 8.5  | 1.2       | 40.4    | 14.6         | 0.3      | 0.63            | 23.1         | 1.2      |
|           | A3     | 7.2     | 32.5     | 14.8                    | 0.6         | 4.7  | 1.1       | 37.6    | 7.1          | 0.3      | 0.61            | 11.6         | 0.8      |
|           | A4#    | 2.5     | 7.1      | 4.2                     | 1.9         | 3.0  | 4.7       | 50.2    | 83.9         | 3.5      | 0.77            | 108.6        | 5.8      |
|           | A6     | 7.0     | 158.7    | 44.3                    | 2.0         | 23.3 | 1.0       | 36.6    | 8.5          | 0.2      | 0.59            | 14.4         | 0.8      |
|           | A7     | 31.7    | 74.6     | 49.2                    | 2.6         | 2.4  | 0.8       | 33.1    | 9.9          | 0.2      | 0.58            | 17.1         | 0.9      |
| 2FK       | Zircon |         |          |                         |             |      |           |         |              |          |                 |              |          |
| 2FK-3     | Z1     | 316.0   | 172.9    | 356.6                   | 118.7       | 0.6  | 8.0       | 61.0    | 61.8         | 1.0      | 0.81            | 76.5         | 4.0      |
|           | Z2     | 94.6    | 50.5     | 106.5                   | 37.3        | 0.6  | 3.7       | 48.1    | 65.1         | 1.1      | 0.76            | 85.3         | 4.5      |
|           | Z3     | 108.2   | 56.4     | 121.5                   | 42.9        | 0.5  | 3.5       | 47.4    | 65.5         | 1.1      | 0.76            | 86.1         | 4.5      |
|           | Z4     | 137.5   | 175.9    | 178.8                   | 64.5        | 1.3  | 3.2       | 48.5    | 66.9         | 1.0      | 0.76            | 88.2         | 4.6      |
|           | Z5     | 153.7   | 84.3     | 173.6                   | 62.8        | 0.6  | 10.6      | 64.1    | 67.2         | 2.6      | 0.78            | 85.7         | 5.4      |
| 2FK-6     | Z1     | 1353.0  | 74.7     | 1370.5                  | 445.3       | 0.1  | 4.1       | 48.1    | 60.4         | 1.2      | 0.77            | 78.8         | 4.2      |
|           | Z3     | 1060.3  | 208.1    | 1109.2                  | 385.6       | 0.2  | 2.9       | 43.8    | 64.6         | 1.3      | 0.75            | 86.7         | 4.7      |
|           | Z4     | 1519.3  | 227.0    | 1572.7                  | 468.8       | 0.2  | 3.0       | 42.8    | 55.5         | 1.1      | 0.74            | 75.4         | 4.1      |
| 2FK-11    | Z1     | 420.7   | 207.1    | 469.4                   | 109.0       | 0.5  | 2.3       | 38.9    | 43.2         | 0.8      | 0.61            | 71.2         | 3.8      |
|           | Z3     | 540.0   | 123.1    | 569.0                   | 173.6       | 0.2  | 3.1       | 48.0    | 56.8         | 1.1      | 0.76            | 74.5         | 4.0      |
|           | Z4     | 1110.5  | 168.3    | 1150.1                  | 302.3       | 0.2  | 4.0       | 45.0    | 48.9         | 1.0      | 0.64            | 76.9         | 4.1      |
|           | Z5     | 1117.2  | 191.8    | 1162.3                  | 439.4       | 0.2  | 3.9       | 45.1    | 70.2         | 1.4      | 0.75            | 93.4         | 5.0      |
|           | Z6     | 776.4   | 140.8    | 809.5                   | 233.5       | 0.2  | 3.0       | 41.7    | 53.7         | 1.1      | 0.73            | 73.2         | 3.9      |
| 2FK-13    | Z2     | 713.9   | 129.6    | 744.3                   | 253.6       | 0.2  | 12.2      | 73.3    | 63.3         | 1.1      | 0.84            | 75.2         | 4.0      |
|           | Z3     | 373.5   | 161.9    | 411.5                   | 128.1       | 0.4  | 5.5       | 52.4    | 57.8         | 1.0      | 0.78            | 73.9         | 3.9      |

| Sample | Grain   | U (ppm) | Th (ppm) | [eU] <sup>a</sup> (ppm) | He (nmol/g) | Th/U | Mass (μg) | Rs (μm) | Raw Age (Ma) | ± σ (Ma) | Ft <sup>b</sup> | Cor Age (Ma) | ± σ (Ma) |  |
|--------|---------|---------|----------|-------------------------|-------------|------|-----------|---------|--------------|----------|-----------------|--------------|----------|--|
|        | Z4      | 764.6   | 207.8    | 813.4                   | 286.3       | 0.3  | 4.3       | 53.3    | 65.4         | 1.1      | 0.78            | 83.4         | 4.4      |  |
| 2FK-16 | Z3#     | 85.4    | 46.4     | 96.3                    | 233.1       | 0.6  | 5.3       | 56.3    | 435.3        | 7.3      | 0.79            | 548.9        | 29.0     |  |
|        | Z6      | 203.5   | 23.5     | 209.0                   | 57.2        | 0.1  | 5.7       | 54.7    | 50.9         | 2.1      | 0.67            | 76.2         | 5.0      |  |
|        | Z9      | 218.9   | 94.8     | 241.2                   | 71.0        | 0.4  | 1.5       | 34.3    | 54.7         | 1.0      | 0.73            | 75.0         | 4.0      |  |
| 2FK-19 | Z2      | 178.1   | 143.4    | 211.7                   | 59.5        | 0.8  | 4.1       | 48.7    | 52.2         | 0.9      | 0.76            | 68.3         | 3.6      |  |
|        | Z4      | 408.9   | 131.3    | 439.7                   | 135.3       | 0.3  | 5.0       | 52.0    | 57.2         | 1.0      | 0.77            | 74.6         | 3.9      |  |
|        | Z5      | 240.8   | 176.7    | 282.3                   | 86.0        | 0.8  | 2.3       | 41.5    | 56.6         | 1.1      | 0.78            | 72.5         | 3.9      |  |
|        | Z6      | 988.5   | 211.7    | 1038.3                  | 330.1       | 0.2  | 1.1       | 31.5    | 59.1         | 1.1      | 0.75            | 78.9         | 4.2      |  |
| 2FK-22 | Z1      | 535.0   | 56.4     | 548.3                   | 178.5       | 0.1  | 11.8      | 69.4    | 60.6         | 1.1      | 0.84            | 72.5         | 3.8      |  |
|        | Z3      | 94.4    | 31.1     | 101.8                   | 30.4        | 0.3  | 6.0       | 57.9    | 55.6         | 0.9      | 0.80            | 69.5         | 3.7      |  |
|        | Z4      | 549.6   | 81.0     | 568.7                   | 178.3       | 0.2  | 12.0      | 69.7    | 58.3         | 1.1      | 0.83            | 70.0         | 3.7      |  |
|        | Z6      | 633.0   | 128.7    | 663.2                   | 215.0       | 0.2  | 6.6       | 52.5    | 60.3         | 2.5      | 0.76            | 78.9         | 5.2      |  |
| 2FK-3  | Apatite |         |          |                         |             |      |           |         |              |          |                 |              |          |  |
|        | A1      | 19.6    | 5.0      | 20.8                    | 4.1         | 0.3  | 6.6       | 65.1    | 36.4         | 0.7      | 0.83            | 43.9         | 2.5      |  |
|        | A2      | 9.3     | 12.2     | 12.2                    | 1.6         | 1.3  | 1.3       | 36.5    | 24.9         | 0.6      | 0.63            | 39.5         | 2.2      |  |
|        | A3#     | 17.8    | 18.5     | 22.1                    | 14.3        | 1.1  | 1.6       | 37.4    | 119.5        | 2.1      | 0.70            | 171.2        | 9.1      |  |
|        | A5      | 15.2    | 10.5     | 17.7                    | 4.1         | 0.7  | 6.0       | 66.9    | 43.5         | 0.7      | 0.84            | 51.7         | 2.7      |  |
| 2FK-11 | A1      | 5.3     | 5.5      | 6.6                     | 0.9         | 1.1  | 3.6       | 58.2    | 24.7         | 0.5      | 0.76            | 32.5         | 1.8      |  |
|        | A3      | 4.4     | 5.6      | 5.8                     | 1.1         | 1.3  | 3.5       | 55.9    | 36.3         | 0.8      | 0.75            | 48.6         | 2.7      |  |
|        | A4#     | 10.4    | 14.1     | 13.7                    | 14.2        | 1.4  | 3.1       | 43.2    | 189.7        | 5.6      | 0.74            | 257.4        | 13.8     |  |
|        | A7      | 7.9     | 16.5     | 11.8                    | 1.1         | 2.2  | 1.4       | 41.2    | 16.8         | 0.5      | 0.66            | 25.5         | 1.5      |  |
|        | A8      | 3.8     | 6.1      | 5.2                     | 1.2         | 1.7  | 3.8       | 56.0    | 42.9         | 1.0      | 0.75            | 57.2         | 3.2      |  |
| 2FK-13 | A4      | 14.9    | 6.0      | 16.3                    | 3.0         | 0.4  | 3.8       | 58.3    | 33.9         | 0.6      | 0.76            | 44.5         | 2.4      |  |
|        | A7      | 28.3    | 39.6     | 37.6                    | 5.0         | 1.4  | 1.3       | 39.6    | 24.9         | 0.5      | 0.66            | 37.9         | 2.1      |  |

| Sample | Grain  | U (ppm) | Th (ppm) | [eU] <sup>a</sup> (ppm) | He (nmol/g) | Th/U | Mass (μg) | Rs (μm) | Raw Age (Ma) | ± σ (Ma) | Ft <sup>b</sup> | Cor Age (Ma) | ± σ (Ma) |
|--------|--------|---------|----------|-------------------------|-------------|------|-----------|---------|--------------|----------|-----------------|--------------|----------|
|        | A8     | 16.3    | 5.6      | 17.7                    | 2.9         | 0.4  | 4.7       | 65.4    | 30.1         | 0.6      | 0.79            | 38.3         | 2.1      |
| 2FK-16 | A2     | 7.9     | 17.2     | 11.9                    | 1.8         | 2.3  | 1.5       | 42.4    | 27.9         | 0.5      | 0.67            | 42.0         | 2.2      |
|        | A5#    | 3.3     | 4.5      | 4.3                     | 2.2         | 1.4  | 7.2       | 54.0    | 92.6         | 1.5      | 0.70            | 132.0        | 6.9      |
|        | A9     | 4.1     | 16.0     | 7.9                     | 1.1         | 4.0  | 1.0       | 36.2    | 25.2         | 0.8      | 0.61            | 41.6         | 2.4      |
|        | A10    | 7.6     | 31.2     | 14.9                    | 1.6         | 4.2  | 0.8       | 33.8    | 19.7         | 0.7      | 0.58            | 33.9         | 2.0      |
| 2FK-22 | A1#    | 1.8     | 16.2     | 5.7                     | 10.6        | 9.1  | 4.0       | 47.7    | 340.7        | 6.1      | 0.75            | 451.9        | 22.1     |
|        | A3#    | 6.1     | 10.4     | 8.5                     | 4.9         | 1.8  | 2.0       | 41.1    | 106.6        | 2.1      | 0.69            | 155.6        | 8.4      |
|        | A5     | 2.8     | 21.2     | 7.8                     | 0.5         | 7.7  | 1.2       | 41.3    | 12.0         | 0.5      | 0.64            | 18.6         | 1.2      |
|        | A7     | 14.5    | 25.3     | 20.4                    | 3.0         | 1.8  | 1.3       | 42.3    | 27.3         | 0.5      | 0.67            | 40.9         | 2.2      |
|        | A8     | 7.6     | 16.7     | 11.5                    | 1.4         | 2.3  | 2.2       | 45.1    | 22.2         | 0.6      | 0.68            | 32.5         | 1.9      |
| 3FK    | Zircon |         |          |                         |             |      |           |         |              |          |                 |              |          |
| 3FK-3  | Z1     | 401.3   | 100.5    | 425.0                   | 132.9       | 0.3  | 4.9       | 49.0    | 58.1         | 1.0      | 0.77            | 75.6         | 4.0      |
|        | Z2     | 252.6   | 45.6     | 263.4                   | 97.0        | 0.2  | 17.6      | 79.4    | 68.4         | 1.2      | 0.86            | 80.0         | 4.2      |
|        | Z4#    | 336.2   | 102.6    | 360.3                   | 169.7       | 0.3  | 8.3       | 68.0    | 87.3         | 1.5      | 0.83            | 105.3        | 5.5      |
|        | Z5     | 194.9   | 31.5     | 202.3                   | 57.1        | 0.2  | 7.3       | 54.0    | 52.6         | 2.2      | 0.76            | 69.1         | 4.5      |
|        | Z6     | 71.7    | 29.9     | 78.7                    | 22.6        | 0.4  | 16.3      | 77.8    | 53.4         | 2.2      | 0.78            | 68.4         | 4.4      |
| 3FK-6  | Z2     | 480.1   | 215.8    | 530.8                   | 165.7       | 0.5  | 7.4       | 58.7    | 58.0         | 1.0      | 0.80            | 72.3         | 3.8      |
|        | Z3     | 562.2   | 149.4    | 597.3                   | 206.2       | 0.3  | 18.8      | 91.5    | 64.1         | 1.1      | 0.87            | 73.6         | 3.9      |
|        | Z4     | 218.9   | 78.5     | 237.3                   | 78.8        | 0.4  | 8.9       | 65.9    | 61.7         | 1.0      | 0.82            | 74.9         | 3.9      |
| 3FK-9  | Z1     | 675.5   | 152.4    | 711.3                   | 202.8       | 0.2  | 5.6       | 53.0    | 53.0         | 1.0      | 0.78            | 67.6         | 3.6      |
|        | Z2     | 601.9   | 104.8    | 626.6                   | 204.8       | 0.2  | 5.0       | 47.9    | 60.8         | 1.0      | 0.76            | 79.9         | 4.2      |
|        | Z3     | 351.5   | 110.5    | 377.4                   | 100.9       | 0.3  | 3.8       | 48.0    | 49.7         | 1.3      | 0.76            | 65.2         | 3.7      |
|        | Z4     | 644.5   | 107.8    | 669.8                   | 244.3       | 0.2  | 6.0       | 54.3    | 67.8         | 1.2      | 0.79            | 85.9         | 4.6      |
|        | Z5     | 294.7   | 86.3     | 315.0                   | 97.9        | 0.3  | 7.7       | 57.5    | 57.8         | 2.4      | 0.73            | 79.2         | 5.1      |
|        | Z6     | 280.8   | 41.2     | 290.5                   | 63.6        | 0.2  | 5.8       | 50.6    | 40.8         | 1.7      | 0.73            | 55.8         | 3.7      |
| 3FK-12 | Z1     | 1988.9  | 248.9    | 2047.3                  | 663.5       | 0.1  | 9.3       | 60.7    | 60.3         | 1.0      | 0.81            | 74.0         | 3.9      |
|        | Z3     | 481.0   | 76.1     | 498.9                   | 175.4       | 0.2  | 9.9       | 59.3    | 65.3         | 1.1      | 0.81            | 80.7         | 4.3      |

| Sample  | Grain | U (ppm) | Th (ppm) | [eU] <sup>a</sup> (ppm) | He (nmol/g) | Th/U | Mass (μg) | Rs (μm) | Raw Age (Ma) | ± σ (Ma) | Ft <sup>b</sup> | Cor Age (Ma) | ± σ (Ma) |
|---------|-------|---------|----------|-------------------------|-------------|------|-----------|---------|--------------|----------|-----------------|--------------|----------|
|         | Z4    | 377.1   | 80.2     | 395.9                   | 125.6       | 0.2  | 5.9       | 56.4    | 59.0         | 1.0      | 0.80            | 74.2         | 3.9      |
| 3FK-15  | Z1    | 680.1   | 134.1    | 711.6                   | 237.6       | 0.2  | 12.3      | 60.0    | 62.1         | 1.1      | 0.81            | 76.5         | 4.0      |
|         | Z2    | 683.7   | 99.1     | 707.0                   | 200.4       | 0.1  | 6.9       | 53.3    | 52.7         | 1.0      | 0.79            | 66.8         | 3.6      |
|         | Z3    | 214.8   | 35.9     | 223.2                   | 68.7        | 0.2  | 8.3       | 67.3    | 57.3         | 1.0      | 0.83            | 69.1         | 3.7      |
| 3FK-19  | Z1    | 539.3   | 136.6    | 571.5                   | 158.6       | 0.3  | 4.3       | 47.7    | 51.6         | 1.0      | 0.76            | 68.4         | 3.7      |
|         | Z2    | 372.1   | 77.7     | 390.3                   | 113.9       | 0.2  | 6.3       | 60.2    | 54.3         | 1.1      | 0.81            | 67.1         | 3.6      |
|         | Z3    | 675.8   | 132.4    | 706.9                   | 194.9       | 0.2  | 6.5       | 54.0    | 51.3         | 1.0      | 0.79            | 64.9         | 3.5      |
| Apatite |       |         |          |                         |             |      |           |         |              |          |                 |              |          |
| 3FK-3   | A2    | 3.3     | 12.1     | 6.1                     | 1.2         | 3.8  | 1.4       | 41.3    | 37.2         | 1.1      | 0.65            | 57.1         | 3.3      |
|         | A3#   | 12.2    | 14.5     | 15.6                    | 39.4        | 1.2  | 1.5       | 34.3    | 453.4        | 7.6      | 0.68            | 661.9        | 34.9     |
|         | A6    | 25.3    | 26.1     | 31.4                    | 3.4         | 1.1  | 1.2       | 36.7    | 20.4         | 0.4      | 0.63            | 32.5         | 1.8      |
|         | A8#   | 1.3     | 5.0      | 2.4                     | 1.8         | 4.1  | 7.2       | 57.9    | 138.6        | 2.8      | 0.67            | 207.5        | 11.2     |
|         | A11   | 4.7     | 21.6     | 9.8                     | 1.2         | 4.7  | 2.8       | 49.8    | 22.9         | 0.5      | 0.71            | 32.5         | 1.7      |
|         | A12   | 19.4    | 14.7     | 22.8                    | 4.6         | 0.8  | 3.5       | 58.8    | 37.1         | 0.6      | 0.76            | 48.7         | 2.6      |
| 3FK-6   | A1    | 9.6     | 7.9      | 11.5                    | 1.6         | 0.9  | 5.1       | 65.3    | 26.7         | 0.5      | 0.78            | 34.1         | 1.8      |
|         | A3    | 9.3     | 20.7     | 14.1                    | 2.3         | 2.3  | 1.5       | 40.6    | 29.6         | 0.6      | 0.65            | 45.4         | 2.5      |
|         | A7    | 7.1     | 7.3      | 8.8                     | 1.3         | 1.1  | 6.1       | 63.3    | 27.8         | 0.6      | 0.78            | 35.6         | 1.9      |
|         | A8    | 13.2    | 9.9      | 15.5                    | 3.6         | 0.8  | 4.2       | 57.8    | 43.1         | 0.7      | 0.76            | 56.8         | 3.0      |
| 3FK-9   | A2    | 19.4    | 14.7     | 22.8                    | 4.6         | 0.8  | 3.5       | 58.8    | 37.1         | 0.6      | 0.76            | 48.7         | 2.6      |
|         | A3    | 10.7    | 12.4     | 13.6                    | 1.8         | 1.2  | 2.8       | 51.5    | 24.3         | 0.5      | 0.73            | 33.4         | 1.8      |
|         | A4    | 13.8    | 8.4      | 15.8                    | 2.7         | 0.6  | 2.6       | 52.0    | 31.6         | 0.6      | 0.73            | 43.1         | 2.3      |
| 3FK-12  | A3    | 11.2    | 15.5     | 14.8                    | 1.6         | 1.4  | 1.3       | 38.8    | 20.5         | 0.6      | 0.64            | 31.9         | 1.8      |
|         | A6#   | 7.2     | 5.7      | 8.6                     | 7.9         | 0.8  | 7.2       | 52.6    | 169.0        | 2.8      | 0.76            | 222.3        | 8.9      |
|         | A7#   | 4.3     | 7.7      | 6.1                     | 7.8         | 1.9  | 4.3       | 47.2    | 236.7        | 4.0      | 0.72            | 326.9        | 17.2     |
|         | A9    | 7.3     | 17.9     | 11.5                    | 1.8         | 2.5  | 0.8       | 34.7    | 29.4         | 1.1      | 0.60            | 49.0         | 3.0      |

| Sample | Grain | U (ppm) | Th (ppm) | [eU] <sup>a</sup> (ppm) | He (nmol/g) | Th/U | Mass (μg) | Rs (μm) | Raw Age (Ma) | ± σ (Ma) | Ft <sup>b</sup> | Cor Age (Ma) | ± σ (Ma) |
|--------|-------|---------|----------|-------------------------|-------------|------|-----------|---------|--------------|----------|-----------------|--------------|----------|
|        | A10   | 9.6     | 7.9      | 11.5                    | 1.6         | 0.9  | 5.1       | 65.3    | 26.7         | 0.5      | 0.78            | 34.1         | 1.8      |
| 3FK-15 | A1    | 18.6    | 28.8     | 25.4                    | 4.5         | 1.6  | 2.9       | 54.4    | 33.2         | 0.6      | 0.74            | 45.2         | 2.4      |
|        | A2#   | 7.2     | 12.8     | 10.2                    | 5.6         | 1.8  | 5.8       | 45.8    | 101.0        | 1.5      | 0.74            | 137.3        | 7.2      |
|        | A4#   | 1.9     | 4.4      | 3.0                     | 1.5         | 2.4  | 5.7       | 54.7    | 93.2         | 2.0      | 0.63            | 147.5        | 8.0      |
|        | A5    | 4.4     | 8.7      | 6.5                     | 0.7         | 2.0  | 3.7       | 52.1    | 20.3         | 0.4      | 0.73            | 27.7         | 1.5      |
|        | A6    | 7.7     | 18.7     | 12.1                    | 1.5         | 2.5  | 1.1       | 39.5    | 23.4         | 0.7      | 0.64            | 36.4         | 2.1      |
| 3FK-19 | A1    | 6.2     | 9.4      | 8.4                     | 0.7         | 1.6  | 2.3       | 49.5    | 15.6         | 0.4      | 0.71            | 21.9         | 1.2      |
|        | A2    | 10.8    | 19.2     | 15.3                    | 2.6         | 1.8  | 3.7       | 57.2    | 31.7         | 0.5      | 0.75            | 42.2         | 2.2      |
|        | A3    | 2.3     | 6.6      | 3.8                     | 0.4         | 3.0  | 3.5       | 58.9    | 20.0         | 0.5      | 0.75            | 26.6         | 1.5      |

eU<sup>a</sup> weights U and Th for their alpha productivity and is calculated as  $[U]+0.235 \times [Th]$ . Ft<sup>b</sup> represents alpha particle ejection correction. Rs represents the radius of grains. Cor age represents the corrected ages.
